# Supplementary material for: The Clinical Manifestations and Chest Computed Tomography Findings of Coronavirus Disease 2019 (COVID-19) Patients in China: A Proportion Meta-Analysis
Source: PubMed Central journal article supplement — Clin Exp Otorhinolaryngol. 2020 May 1;13(2):95–105. doi: 10.21053/ceo.2020.00570 (PMC7248616; doi:10.21053/ceo.2020.00570), 2020-05-01
Supplement: ceo-2020-00570-suppl1.pdf [file ceo-2020-00570-suppl1.pdf]

**Supplementary Table 1.** Quality assessment tool for case series studies provided by the National Institutes of Health

| Criteria                                                                                                                    |
|-----------------------------------------------------------------------------------------------------------------------------|
| Question                                                                                                                    |
| Q1. Was the study question or objective clearly stated?                                                                     |
| Q2. Was the study population clearly and fully described, including a case definition?                                      |
| Q3. Were the cases consecutive?                                                                                             |
| Q4. Were the subjects comparable?                                                                                           |
| Q5. Was the intervention clearly described?                                                                                 |
| Q6. Were the outcome measures clearly defined, valid, reliable, and implemented consistently across all study participants? |
| Q7. Was the length of follow-up adequate?                                                                                   |
| Q8. Were the statistical methods well-described?                                                                            |
| Q9. Were the results well-described?                                                                                        |

Quality rating (good, fair, or poor): yes, no, or others (cannot determine; not applicable; not reported).  
Adapted from National Heart, Lung, and Blood Institute [27].
