# Supplementary material for: The Clinical Manifestations and Chest Computed Tomography Findings of Coronavirus Disease 2019 (COVID-19) Patients in China: A Proportion Meta-Analysis
Source: PubMed Central journal article supplement — Clin Exp Otorhinolaryngol. 2020 May 1;13(2):95–105. doi: 10.21053/ceo.2020.00570 (PMC7248616; doi:10.21053/ceo.2020.00570), 2020-05-01
Supplement: ceo-2020-00570-suppl3.pdf [file ceo-2020-00570-suppl3.pdf]

**Pathologic pattern**

**Ground Glass opacity**

**Inside Wuhan**

| Study               | No. of patients | Patients with GGO% | CI lower%   | CI upper%   | % weight     |
|---------------------|-----------------|--------------------|-------------|-------------|--------------|
| Zhou F <i>et al</i> | 191             | 71.2               | 7.0         | 6.3         | 34.6         |
| Zhou.H <i>et al</i> | 62              | 40.3               | 12.3        | 13.2        | 32.9         |
| Li <i>et al</i>     | 51              | 90.2               | 11.6        | 6.5         | 32.4         |
| <b>Combined</b>     | <b>304</b>      | <b>68.7</b>        | <b>25.9</b> | <b>20.8</b> | <b>100.0</b> |

Q=35.7138, df=2 ( $p < 0.0001$ ),  $I^2=94.40\%$  (95% CI for  $I^2$ : 87.02 to 97.58), Egger bias=too few

**Outside Wuhan**

| Study                       | No. of patients | Patients with GGO% | CI lower%   | CI upper%   | % weight     |
|-----------------------------|-----------------|--------------------|-------------|-------------|--------------|
| Liu <i>et al</i> (Zhejiang) | 10              | 40.0               | 27.8        | 33.8        | 18.5         |
| Zhu <i>et al</i> (Anhui)    | 32              | 46.9               | 17.8        | 18.4        | 25.0         |
| Zhao <i>et al</i> (Hunan)   | 101             | 86.1               | 8.3         | 6.1         | 28.4         |
| Xu <i>et al</i> (Gunagdong) | 90              | 72.2               | 10.4        | 8.9         | 28.2         |
| <b>Combined</b>             | <b>233</b>      | <b>72.6</b>        | <b>27.6</b> | <b>10.1</b> | <b>100.0</b> |

Q=24.7375, df=3 ( $p < 0.0001$ ),  $I^2=87.87\%$  (95% CI for  $I^2$ : 71.29 to 94.88), Egger bias=-4.955744 ( $p = 0.0789$ )

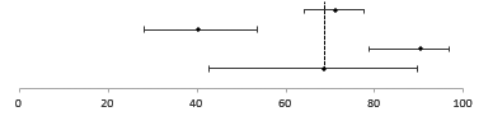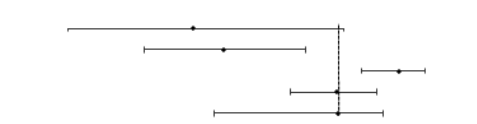

**A**

**Consolidation**

**Inside Wuhan**

| Study               | No. of patients | Patients with consolidation% | CI lower%   | CI upper%   | % weight     |
|---------------------|-----------------|------------------------------|-------------|-------------|--------------|
| Zhou F <i>et al</i> | 191             | 58.6                         | 7.3         | 7.1         | 36.7         |
| Zhou.H <i>et al</i> | 62              | 33.9                         | 11.5        | 13.1        | 32.2         |
| Li <i>et al</i>     | 51              | 41.2                         | 13.6        | 14.7        | 31.1         |
| <b>Combined</b>     | <b>304</b>      | <b>45.3</b>                  | <b>15.8</b> | <b>16.3</b> | <b>100.0</b> |

Q=13.8334, df=2 ( $p=0.0010$ ),  $I^2=85.54\%$  (95% CI for  $I^2$ : 57.66-95-06), Egger bias=too few

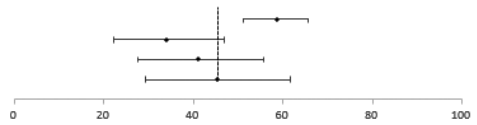

**Outside Wuhan**

| Study                       | No. of patients | Patients with consolidation% | CI lower%   | CI upper%   | % weight   |
|-----------------------------|-----------------|------------------------------|-------------|-------------|------------|
| Liu <i>et al</i> (Zhejiang) | 10              | 50.0                         | 31.3        | 31.3        | 19.2       |
| Zhu <i>et al</i> (Anhui)    | 32              | 12.5                         | 9.0         | 16.5        | 25.1       |
| Zhao <i>et al</i> (Hunan)   | 101             | 43.6                         | 9.8         | 10.2        | 27.9       |
| Xu <i>et al</i> (Gunagdong) | 90              | 13.3                         | 6.2         | 8.8         | 27.76      |
| <b>Combined</b>             | <b>233</b>      | <b>27.6</b>                  | <b>16.8</b> | <b>21.1</b> | <b>100</b> |

Q=28.9027, df=3 ( $p < 0.0001$ ),  $I^2=89.62\%$  (95% CI for  $I^2$ : 76.26-95.46), Egger bias=2.667533 ( $p = 0.6036$ )

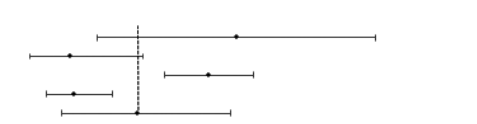

**B**

Supplementary Fig. 1. Comparison of proportion of chest computed tomography findings between Wuhan and outside of Wuhan in China [33-41]. The proportions in ground-glass opacity (GGO; A) and consolidation (B). CI, confidence interval.
